# Supplementary material
Source: publisher figshare collection journal article supplement (https://karger.figshare.com/ndownloader/files/26150648)
Supplement: Supplementary file 1 [file 26150648]

Supplement 4. Rate of underlying causes of death in mortality cases with trisomy 18 by ICD10 code (2014-2016) (n = 565)
